# Supplementary material
Source: publisher figshare collection journal article supplement (https://asha.figshare.com/articles/dataset/_/17699423)
Supplement: Supplementary file 1 [file 1]

**Supplemental Material S1.** People with aphasia cognitive and self-reported communication scores.

| ID         | Age<br>Ed/RE     | WAB-AQ<br>Severity/Type | CLQT+        | ACOM  | TPO<br>Y;M        |
|------------|------------------|-------------------------|--------------|-------|-------------------|
| P1         | 40<br>Coll/Cau   | 93.5<br>Mild Anom       | NLC: 41 WNL  | 62.51 | 6;9               |
| P2         | 69<br>Coll/Cau   | 86.0<br>Mild Anom       | NLC: 27 Mild | 43.09 | 7;9               |
| <b>P3</b>  | 42<br>H.S./CAU   | 77.2<br>Mild Cond       | NLC: 41 WNL  | 49.59 | 3;2*              |
| P4         | 45<br>Coll/Cau   | 95.7<br>Min Anom        | NLC: 42 WNL  | 46.61 | 4;11              |
| <b>P5</b>  | 67<br>Grad/A-A   | 66.4<br>Mod TCS         | NLC: 27 Mild | 48.12 | 19;4              |
| P6         | 74<br>Coll/Cau   | 92.7<br>Mild Anom       | NLC: 37 WNL  | 59.80 | 8;7               |
| <b>P7</b>  | 42<br>Coll/A-A   | 89.2<br>Mild Anom       | NLC: 43 WNL  | 67.74 | 8;10              |
| <b>P8</b>  | 67<br>Coll/Cau   | 68.0<br>Mod TCM         | NLC: 40 WNL  | 39.33 | 2;1               |
| P9         | 54<br>Coll/Cau   | 86.4<br>Mild Anom       | NLC: 38 Mild | 53.49 | 0;6               |
| <b>P10</b> | 38<br>Grad/Cau   | 96.3<br>Min Anom        | NLC: 43 WNL  | 60.57 | 5;4               |
| P11        | 76<br>Coll/Cau   | 85.1<br>Mild Cond       | NLC: 40 WNL  | 53.25 | 6;9               |
| P12~       | 47<br>Grad/Asian | 61.0<br>Mod Cond        | NLC: 38 Mod  | 43.79 | 5;1               |
| P13        | 74<br>H.S./Cau   | 88.5<br>Mild Anom       | NLC: 35 WNL  | 66.61 | 0;11 <sup>†</sup> |
| P14        | 57<br>Coll/Cau   | 91.2<br>Mild Anom       | NLC: 46 WNL  | 44.64 | 3;6               |
| <b>P15</b> | 77<br>Grad/Cau   | 97.2<br>Min Anom        | NLC: 37 WNL  | 65.93 | 0;9               |
| <b>P16</b> | 65<br>H.S./Cau   | 94.7<br>Min Anom        | NLC: 40 WNL  | 50.99 | 3;6               |
| P17        | 41<br>Coll/Cau   | 65.8<br>Mod Wern        | NLC: 43 WNL  | 44.76 | 1;11              |
| <b>P18</b> | 62<br>Grad/Cau   | 52.2<br>Mod Cond        | NLC: 41 WNL  | 34.40 | 10;10             |
| <b>P19</b> | 64<br>H.S./Cau   | 58.8<br>Mod Broca       | NLC: 41 WNL  | 51.55 | 6;0               |
| P20        | 65<br>Coll/Cau   | 90.4<br>Mild Anom       | NLC: 43 WNL  | 51.99 | 4;8               |

Note. ID = identifier; WAB-AQ = Western Aphasia Battery, Aphasia Quotient (Kertesz, 2006); CLQT+ = Cognitive Linguistic Quick Test+ (Helm-Estabrooks, 2017); ACOM = Aphasia Communication Outcome Measure (Hula et al., 2015); TPO, Y;M = time post-onset, years, months; Ed = education; RE= race/ethnicity; NLC = non-linguistic cognition score; WNL = within normal limits; Coll = college; Cau = Caucasian, not Latino/a; **bold = female**, non-bold = male; Cond = conduction aphasia \* = 5 left hemisphere strokes; H.S. = high school; CAU = Caucasian, Latino; Min = minimal aphasia, AQ > 93.8; Mod = moderate; TCS = transcortical sensory aphasia; Grad = graduate degree; A-A = African American, not Latino/a; TCM = transcortical motor aphasia; ~ = First language was Korean until age 6, then immersed in American school; <sup>†</sup> = 2 left hemisphere strokes; Wern = Wernicke's aphasia.
