# Supplementary material
Source: publisher figshare collection journal article supplement (https://asha.figshare.com/articles/dataset/_/17699423)
Supplement: Supplementary file 3 [file 1]

**Supplemental Material S5.** TI mechanisms: Distribution and rate of simultaneous use by each conversation dyad condition.

| Conversation Dyad Type                             | TI Mechanism %/(raw data) |                  |                  |                   | Number of Methods %/(raw data) |                  |                  |
|----------------------------------------------------|---------------------------|------------------|------------------|-------------------|--------------------------------|------------------|------------------|
|                                                    | NC-TI                     | T-C              | DD               | CO                | 0                              | 1                | 2+               |
| <b>Data for Each Participant Group with SLP-PS</b> |                           |                  |                  |                   |                                |                  |                  |
| PWAmild (with SLP-Ps)                              | 7.9<br>(8/101)            | 30.7<br>(31/101) | 52.5<br>(53/101) | 61.4<br>(62/101)  | 7.9<br>(8/101)                 | 50.5<br>(51/101) | 41.6<br>(42/101) |
| PWAmod (with SLP-Ps)                               | 11.1<br>(4/36)            | 36.1<br>(13/36)  | 33.3<br>(12/36)  | 58.3<br>(21/36)   | 11.1<br>(4/36)                 | 55.6<br>(20/36)  | 33.3<br>(12/36)  |
| M-PWoA (with SLP-Ps)                               | 0.7<br>(1/149)            | 22.8<br>(34/149) | 46.9<br>(70/149) | 81.2<br>(121/149) | 0.7<br>(1/149)                 | 53.0<br>(79/149) | 46.3<br>(69/149) |
| <b>Data for SLP-Ps with Each Participant Group</b> |                           |                  |                  |                   |                                |                  |                  |
| SLP-Ps (with PWAmild)                              | 5.3<br>(7/133)            | 48.1<br>(64/133) | 36.1<br>(48/133) | 74.4<br>(99/133)  | 5.3<br>(7/133)                 | 39.9<br>(53/133) | 54.9<br>(73/133) |
| SLP-Ps (with PWAmod)                               | 0.0<br>(0/96)             | 64.6<br>(62/96)  | 36.5<br>(35/96)  | 70.8<br>(68/96)   | 0.0<br>(0/96)                  | 37.5<br>(36/96)  | 62.5<br>(60/96)  |
| SLP-Ps (with M-PWoA)                               | 1.9<br>(3/158)            | 33.5<br>(53/158) | 32.3<br>(51/158) | 75.3<br>(119/158) | 1.9<br>(3/158)                 | 54.4<br>(86/158) | 43.7<br>(69/158) |

*Note.* TI = topic initiation; Conversation Dyad Type = each dyad group, data is for group named first, e.g., PWAmild (with SLP-Ps) reports data from the people with aphasia, mild when they were in conversation with speech-language pathologist partners; NC-TI = noncoherent topic initiation; T-C = topic-closing; DD = discontinuity device; CO = cohesion; items in these columns do not add to 100% because mechanisms could be used simultaneously; 0 = no explicit method of topic initiation (i.e., noncoherent topic initiation); 1 = 1 method of topic initiation used; 2+ = 2 or more methods of topic initiation used; PWAmild = persons with aphasia, mild; SLP-P = speech-language pathologist partner; PWAmod = persons with aphasia, moderate; M-PWoA = people without aphasia.
