# Supplementary material
Source: publisher figshare collection journal article supplement (https://asha.figshare.com/articles/dataset/_/17699423)
Supplement: Supplementary file 4 [file 1]

## Supplemental Material S2. Social Conversation Collection Protocol: Setting the context for a casual conversation.

| Component                      | Description                                                                                                                                                                                                                                                                                                                                                                                                                                                                                                                                                                                                                                                                                                                                                                                                                                                                                                                                                                                                                                                                                                                                                                                                                                             |
|--------------------------------|---------------------------------------------------------------------------------------------------------------------------------------------------------------------------------------------------------------------------------------------------------------------------------------------------------------------------------------------------------------------------------------------------------------------------------------------------------------------------------------------------------------------------------------------------------------------------------------------------------------------------------------------------------------------------------------------------------------------------------------------------------------------------------------------------------------------------------------------------------------------------------------------------------------------------------------------------------------------------------------------------------------------------------------------------------------------------------------------------------------------------------------------------------------------------------------------------------------------------------------------------------|
| Casual Conversation            | Let the participants know ahead of the conversation that: <ul style="list-style-type: none"> <li>A social, casual-type, everyday conversation is desired</li> <li>There is no topic or agenda for the conversation</li> <li>No topic is provided, topics can shift as they do in everyday conversation</li> <li>Either partner can start the conversation</li> </ul>                                                                                                                                                                                                                                                                                                                                                                                                                                                                                                                                                                                                                                                                                                                                                                                                                                                                                    |
| Time                           | 15-20 minutes; analyze a middle section about 10 minutes long                                                                                                                                                                                                                                                                                                                                                                                                                                                                                                                                                                                                                                                                                                                                                                                                                                                                                                                                                                                                                                                                                                                                                                                           |
| Partner*                       | SLP or a family or friend ("home-partner")                                                                                                                                                                                                                                                                                                                                                                                                                                                                                                                                                                                                                                                                                                                                                                                                                                                                                                                                                                                                                                                                                                                                                                                                              |
| Space                          | A casual, comfortable space; if testing is being conducted, use separate spaces for testing and the conversation (if possible)                                                                                                                                                                                                                                                                                                                                                                                                                                                                                                                                                                                                                                                                                                                                                                                                                                                                                                                                                                                                                                                                                                                          |
| Training for SLP               | Do/Don't list below<br>Readings on conversational environment, interactions, and types of conversation**<br>Utterance-by-utterance decision flowsheet, Supplemental Material S3                                                                                                                                                                                                                                                                                                                                                                                                                                                                                                                                                                                                                                                                                                                                                                                                                                                                                                                                                                                                                                                                         |
| SLP and Home Partner Protocols |                                                                                                                                                                                                                                                                                                                                                                                                                                                                                                                                                                                                                                                                                                                                                                                                                                                                                                                                                                                                                                                                                                                                                                                                                                                         |
| Home Partner                   | Instructions to partner and PWA: We'd like to get an idea of what typical, everyday conversations are like at home: <ul style="list-style-type: none"> <li>Please video record a conversation for 15-20 minutes on any topic(s)</li> <li>Neither partner needs to do anything special</li> <li>We aren't looking for the person with aphasia to demonstrate any particular language skills or knowledge</li> <li>Partners can use speech, gestures, writing, drawing (have paper/pen available)</li> </ul>                                                                                                                                                                                                                                                                                                                                                                                                                                                                                                                                                                                                                                                                                                                                              |
| SLP-Partner                    | Minimize clinical feel of the conversation and maximize the casual feel with these techniques: <div> <div> <p><b>DO:</b></p> <ul style="list-style-type: none"> <li>Show interest with <ul style="list-style-type: none"> <li>Eye contact</li> <li>Body language</li> <li>Nodding, saying "mhm"</li> </ul> </li> <li>Make comments</li> <li>Share stories about yourself</li> <li>Allow topic to shift naturally</li> <li>Give plenty of time</li> <li>Silence is ok</li> <li>Be receptive to and accept all communication modalities</li> <li>If you don't understand, say so</li> <li>Paraphrase what you do understand</li> </ul> </div> <div> <p><b>DON'T</b></p> <ul style="list-style-type: none"> <li>Ask lots of questions</li> <li>No phonemic or semantic cueing</li> <li>Request correct verbal words or better production if you understand</li> <li>Don't request verbal production of ideas that are communicated nonverbally</li> <li>Request person to tell you something you already know</li> <li>Act like an interviewer (if you notice it feels like an interview, try making comments and/or tell a story about yourself)</li> <li>Tell or instruct the person regarding strategies or how to communicate</li> </ul> </div> </div> |

*Note.* SLP = speech-language pathologist. \*Partners: The current study made use of unfamiliar SLP partners only, no home-partners participated; see Leaman & Edmonds, 2019a, for information about using Home-Partners. \*\*Readings: excerpts were used from Hengst & Duff, 2007; Hengst, Duff, & Jones, 2019; Simmons-Mackie & Damico, 1999; Simmons-Mackie & Damico, 2008.
