# Supplementary material
Source: publisher figshare collection journal article supplement (https://asha.figshare.com/articles/dataset/_/17699423)
Supplement: Supplementary file 5 [file 1]

### Supplemental Material S3. Social Conversation Collection Protocol: Utterance-by-utterance decision-making.

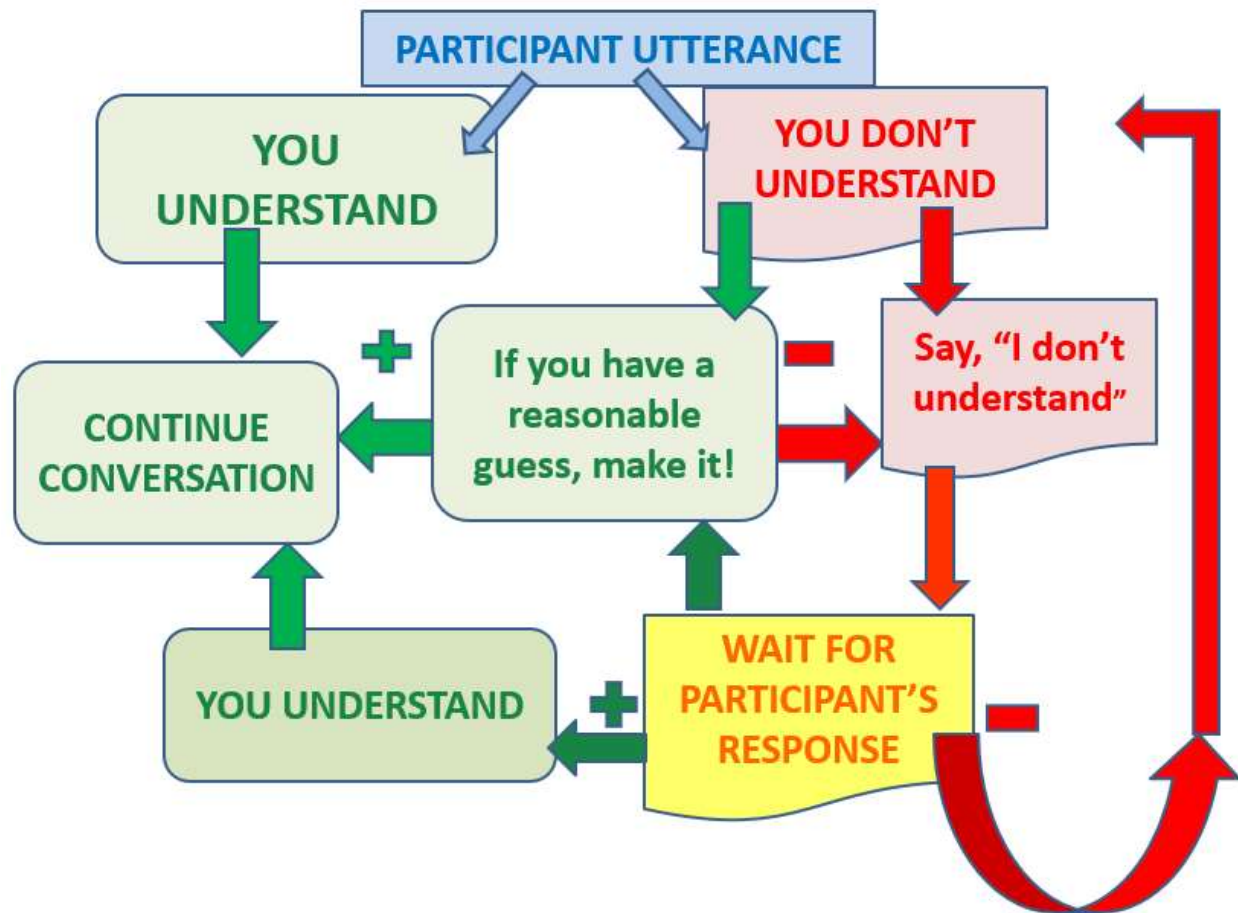

1. Participant says something
2. If partner understands: follow pathway to left, and continue conversation
3. If partner doesn't understand: follow pathway to right
  - a. If partner has a guess: follow pathway to center
    - i. If guess was correct: follow pathway to left, and continue conversation
    - ii. If guess was wrong: go to 3b
  - b. If partner needs clarification: say "I don't understand"\*
    - i. Wait for response, provide as much time as the person with aphasia needs
      - If partner understands: follow pathway to left, and continue conversation
      - If partner doesn't understand: say "I don't understand,"\* return to 3b
      - Procedure cycles up to three times if needed
  - c. If partner still doesn't understand after 3 cycles, partner can use therapy techniques such as suggesting a strategy, giving choices, etc., or partners may decide to let it go/move on

*Note.* \*= partner says "I don't understand," "I didn't get that," "Can you tell me again?" or a comparable request to have the utterance stated again; partner's request is not scripted, partner does not assist or instruct participant (unless requested to do so), strategies are not suggested; participant can use any and all communication modalities desired, and partner accepts all modalities and does not request a verbal production if the nonverbal is understood.
